# Supplementary material for: Epidermal Growth Factor Receptor Inhibition Reduces Angiogenesis via Hypoxia-Inducible Factor-1α and Notch1 in Head Neck Squamous Cell Carcinoma
Source: PubMed Central journal article supplement (PMC4344331; doi:10.1371/journal.pone.0119723), 2015-02-27

## Supplementary Figure S2

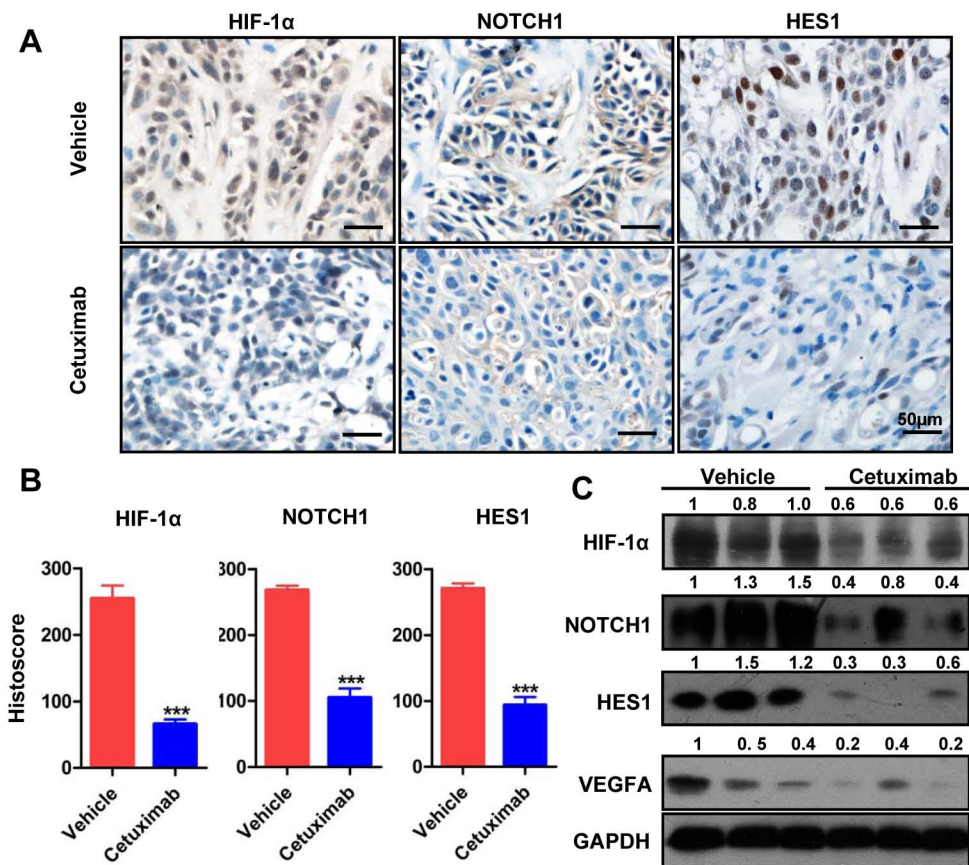

Supplement: pone.0119723.s003.pdf [file pone.0119723.s003.pdf]
